# Supplementary material for: Phosphorus Feast and Famine in Cyanobacteria: Is Luxury Uptake of the Nutrient Just a Consequence of Acclimation to Its Shortage?
Source: MDPI journal article supplement (doi:10.3390/cells9091933), 2020-08-21
Supplement: s1 [file s1]

# Supplementary material

**Table S1.** Primers used for qRT-PCR in this work.

|                                                                 |             |                          |
|-----------------------------------------------------------------|-------------|--------------------------|
| Inorganic pyrophosphatase<br>( <i>ppa</i> ; all3570)            | ppaRT fwd   | GCTACGCTCACGTAAAATCTTTG  |
|                                                                 | ppaRT rev   | TTTGTAACCTACGGAAAACTCAGC |
| P <sub>i</sub> transporter ( <i>pstS1</i> ;<br>all4575)         | pstS1RT fwd | ACTAGCTTACAACCTGCCTGG    |
|                                                                 | pstS1RT rev | AGGTTGACATTAGGGTTAGCAG   |
| P <sub>i</sub> transporter ( <i>pstS2</i> ;<br>all0911)         | pstS2RT fwd | GATGACGGATGCTGAAATTGC    |
|                                                                 | pstS2RT rev | TGTTGCACGGGATAATCTGAG    |
| Phosphatase/kinase 2 ( <i>ppk2</i> ;<br>all2088)                | ppk2RT_fwd  | GTAAATGATGTGCGTGAAAGGG   |
|                                                                 | ppk2RT_rev  | GTGTAAACCATTTGCGATCGG    |
| Polyphosphate kinase 1<br>( <i>ppk1</i> ; alr3593)              | ppk1RT_fwd  | TCGTCTATGGTTTAGTGGGTCT   |
|                                                                 | ppk1RT_rev  | CTGTATAGAGTCGTGCCGTTT    |
| Polyphosphate-dependent<br>glucokinase ( <i>ppgk</i> ; all1371) | PPGKRT_fwd  | AAAGGTAAGGGTGTAGAGTTGG   |
|                                                                 | PPGKRT_rev  | CTTCGTAAGTTTCCCCTTTGC    |
| Exo-polyphosphatase<br>( <i>ppx</i> ; all3552)                  | ppxRT_fwd   | GAGAATGACAAATGCCGAAAGAG  |
|                                                                 | ppxRT_rev   | AATGACTCCACACCCAACAG     |
| Inositol monophosphatase<br>(all2917)                           | vtcRT_fwd   | TTTGGGTAAGTTAGAGGACGC    |
|                                                                 | vtcRT_rev   | TGGAGTGTTGAGGAAAGTGAC    |
| Ribonuclease ( <i>rnpA</i> ) —<br>endogenous control            | rnpART_fwd  | GCGAGCATTAATAACCGTCATC   |
|                                                                 | rnpART_rev  | ACCGCCCTCTTACTAACTTTG    |

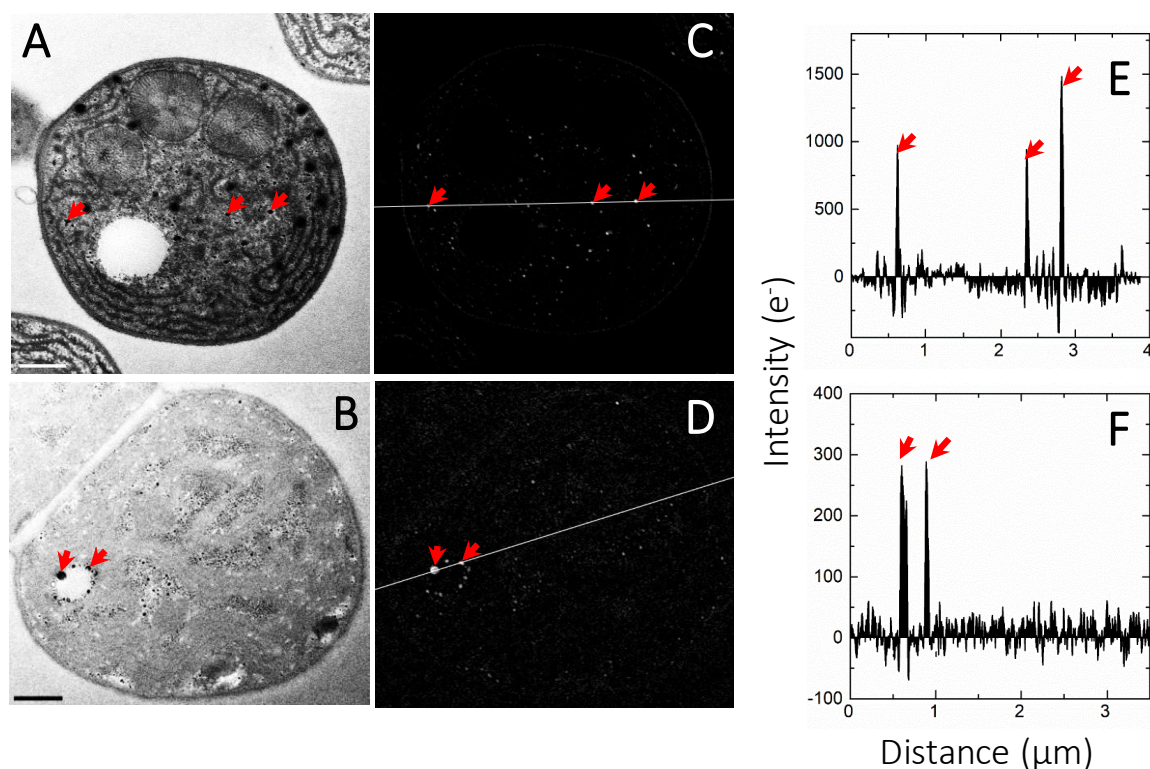

**Fig. S1.** Accumulation of polyphosphate in the cells of *Nostoc* sp. PCC 7118 visualized energy-filtered transmission electron microscopy (EFTEM). Transient polyphosphate accumulation during lag-phase (4 h after re-feeding of P-starved cells with P<sub>i</sub>; A, C, E) and re-accumulation of polyphosphate at early stationary phase (7 d after re-feeding of P-starved cells with P<sub>i</sub>; B, D, F; see also Figs. 6, 7). TEM images (A, B) along with the corresponding EFTEM P-maps (C, D), and P signal intensity profiles (E, F, see the white lines in C, D) are shown. Scale bar = 0.5  $\mu m$ .

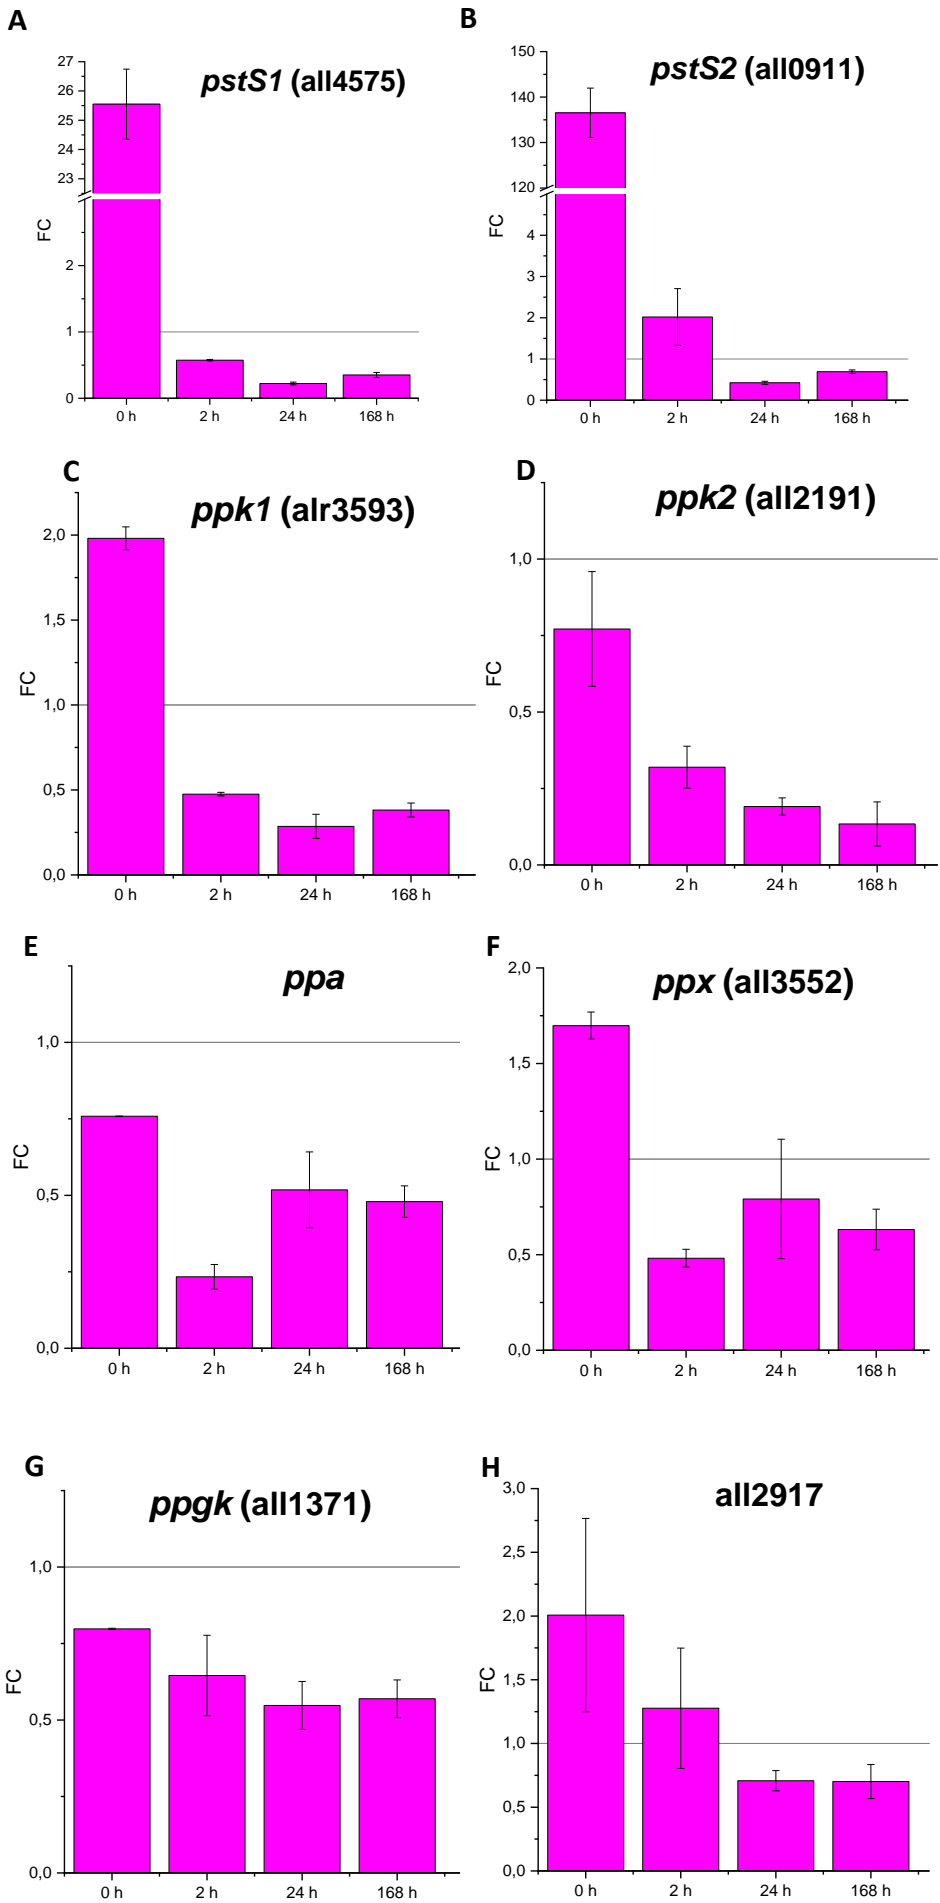

**Fig. S2.** Changes in the expression of the genes coding for the (A, B)  $P_i$  transporters; (C, D) putative polyphosphate kinases; (E) inorganic pyrophosphatase; (F) endonuclease; (G) polyP-dependent glucokinase; and (H) an inositol monophosphatase in the P-starved cells *Nostoc* sp. PCC 7118 at different times after  $P_i$  re-feeding (indicated on the graphs) estimated with qRT-PCR (see Methods). The transcript levels of the target genes vs. ribonuclease rnpA (endogenous control) were calculated on fold-change scale relative to those at P-sufficient logarithmic growth.

**Table S2.** Changes in the expression level (log<sub>2</sub>FC FPKM calculated relative to the P-sufficient exponentially growing preculture) of the genes involved in response to shortage of P and, potentially, in its luxury uptake in *Nostoc* sp. PCC 7118. The tentative functional annotation was given according to the published genome of its parent strain *Nostoc* sp. PCC 7120 [1-4].

| ORF     | Name (description)                                                                                        | Conditions         |                   |               |        |
|---------|-----------------------------------------------------------------------------------------------------------|--------------------|-------------------|---------------|--------|
|         |                                                                                                           | Preculture<br>(+P) | P-starved<br>(-P) | Recovery (+P) |        |
|         |                                                                                                           |                    |                   | 1 day         | 7 days |
| all4502 | <i>sphS</i> (P-starvation response regulator, sensory histidine kinase)                                   | 0.28               | -0.97             | -0.47         | -0.62  |
| all4503 | <i>sphR</i> (P-starvation response regulator)                                                             | 0.53               | -1.39             | -0.82         | -0.81  |
| all4501 | <i>phoU</i> (P-starvation response regulator, repressor of <i>Pho</i> regulon)                            | -0.14              | -0.6              | -0.52         | 0.46   |
| all4573 | <i>pstA1</i> (ABC-type P <sub>i</sub> transporter/binding protein)*                                       | -1.92              | -0.43             | -0.47         | -0.1   |
| all4572 | <i>pstB1</i> (ABC-type P <sub>i</sub> transporter/binding protein)                                        | -1.56              | -0.28             | -0.1          | -0.58  |
| all4574 | <i>pstC1</i> (ABC-type P <sub>i</sub> transporter/binding protein)*                                       | -2.76              | -0.13             | -0.29         | -0.09  |
| all4575 | <i>pstS1</i> (ABC-type P <sub>i</sub> transporter/binding protein)*                                       | -3.74              | -0.18             | -0.37         | -0.69  |
| alr1094 | <i>sphX</i> (putative periplasmic P <sub>i</sub> transporter – P <sub>i</sub> -binding protein, ABC-type) | -0.46              | -0.56             | -0.65         | 0.06   |
| all0917 | putative periplasmic transporter, ABC-type                                                                | -5.43              | 1.8               | 0.96          | 0.75   |
| all0907 | <i>pstX</i> (an ABC-type P <sub>i</sub> transporter/binding protein)*                                     | -1.01              | 0.03              | -1.09         | -0.59  |
| all0909 | <i>pstA2</i> (ABC-type P <sub>i</sub> transporter/binding protein)*                                       | -2.76              | 0.88              | -0.16         | -1.92  |
| all0908 | <i>pstB2</i> (ABC-type P <sub>i</sub> transporter/binding protein)*                                       | -0.94              | -0.4              | -0.9          | -0.45  |
| all0910 | <i>pstC2</i> (ABC-type P <sub>i</sub> transporter/binding protein)*                                       | -3.62              | -0.37             | -0.58         | -0.79  |
| all0911 | <i>pstS2</i> (ABC-type P <sub>i</sub> transporter/binding protein)*                                       | -6.09              | 0.95              | -0.03         | -0.78  |

\*High-affinity P<sub>i</sub> transporters residing in the cytoplasmic membrane.

**Table S3.** Changes in the expression level (log<sub>2</sub>FC FPKM calculated relative to the P-sufficient exponentially growing preculture) of the genes involved in phosphonate uptake and assimilation in *Nostoc* sp. PCC 7118. The tentative functional annotation ois given according to the published genome of its parent strain *Nostoc* sp. PCC 7120 [1-3].

| ORF      | Name        | Conditions         |                   |               |        |
|----------|-------------|--------------------|-------------------|---------------|--------|
|          |             | Preculture<br>(+P) | P-starved<br>(-P) | Recovery (+P) |        |
|          |             |                    |                   | 1 day         | 7 days |
| all2230  | <i>phnC</i> | -4.74              | 0.38              | -1            | -1     |
| all2228  | <i>phnD</i> | -2.53              | -1.38             | -1.8          | -1     |
| alr2226  | <i>phnE</i> | -2.85              | 0.25              | 0.11          | 0.77   |
| alll2225 | <i>phnG</i> | -0.39              | -0.99             | -5.38         | -1.25  |
| all2224  | <i>phnH</i> | -0.66              | 0.48              | -1.38         | -1.38  |

**Table S4.** Changes in the expression level ( $\log_2$ FC FPKM calculated relative to the P-sufficient exponentially growing preculture) of the genes encoding the components of the light-harvesting antenna and RuBisCo in *Nostoc* sp. PCC 7118. The tentative functional annotation ois given according to the published genome of its parent strain *Nostoc* sp. PCC 7120 [4].

| Name (description)                                             | Conditions |           |               |        |
|----------------------------------------------------------------|------------|-----------|---------------|--------|
|                                                                | Preculture | P-starved | Recovery (+P) |        |
|                                                                | (+P)       | (-P)      | 1 day         | 7 days |
| <i>pecA</i> (phycoerythrocyanin alpha chain)                   | 4.26       | -9.41     | -5.21         | -0.99  |
| <i>pecB</i> (phycoerythrocyanin beta chain)                    | 4.23       | -10.61    | -4.79         | -1.09  |
| <i>pecC</i> (phycoerythrocyanin-associated rod linker protein) | 4.54       | -7.71     | -4.77         | -1.67  |
| <i>pecE</i> (bilin biosynthesis protein)                       | 4.62       | -6.25     | -4.76         | -2.52  |
| <i>pecF</i> (bilin biosynthesis protein)                       | 3.25       | -4.69     | -3.4          | -2.61  |
| <i>cpcA</i> (phycocyanin alpha chain)                          | 2.48       | -5.2      | -0.57         | 0.73   |
| <i>cpcB</i> (phycocyanin beta chain)                           | 2.49       | -5.35     | -0.58         | 0.7    |
| <i>cpcC</i> (phycocyanin-associated rod linker protein)        | 3.53       | -5.38     | -1.61         | 0.27   |
| <i>cpcD</i> (rod-capping linker polypeptide)                   | 3.87       | -7.34     | -1.44         | 0.54   |
| <i>cpcE</i> (phycocyanobilin lyase alpha subunit)              | 4.26       | -7.84     | -1.67         | 0.62   |
| <i>cpcF</i> (phycocyanobilin lyase beta subunit)               | 3.86       | -6.56     | -1.52         | -0.02  |
| <i>cpcG1</i> (phycobilisome rod-core linker protein)           | 3.37       | -5.61     | -1.17         | 0.1    |
| <i>cpcG2</i> (phycobilisome rod-core linker protein)           | 3.24       | -4.01     | -1.14         | 0.22   |
| <i>cpcG3</i> (phycobilisome rod-core linker protein)           | 3.24       | -4.35     | -1            | 0.07   |
| <i>cpcG4</i> (phycobilisome rod-core linker protein)           | 0.79       | -1.41     | 0.21          | 0.69   |
| <i>rbcL</i> (RuBisCo large subunit)                            | 1.35       | -1.25     | -0.08         | -0.53  |
| <i>rbcS</i> (RuBisCo small subunit)                            | 1.34       | -1.33     | 0.07          | -0.46  |
| <i>rca</i> (RuBisCo activase)                                  | -0.35      | -0.79     | 0.41          | -0.69  |

**Table S5.** Changes in the expression level ( $\log_2$ FC FPKM calculated relative to the P-sufficient exponentially growing preculture) of the genes encoding the enzymes of cyanophycin turnover in *Nostoc* sp. PCC 7118. The tentative functional annotation ois given according to the published genome of its parent strain *Nostoc* sp. PCC 7120 [4].

| ORF     | Name (description)                  | Conditions |           |               |        |
|---------|-------------------------------------|------------|-----------|---------------|--------|
|         |                                     | Preculture | P-starved | Recovery (+P) |        |
|         |                                     | (+P)       | (-P)      | 1 day         | 7 days |
| –       | <i>cphA1</i> (cyanophycin synthase) | -1.82      | 1.09      | 0.53          | 0.85   |
| –       | <i>cphA2</i> (cyanophycin synthase) | 0.24       | -0.19     | 0.08          | 0.08   |
| –       | <i>cphB2</i> (cyanophycin synthase) | 1.11       | -1.03     | -0.34         | -0.11  |
| all3922 | – (isoaspartyl dipeptidase)         | -0.43      | 1.27      | 0.75          | 0.13   |

## References

1. Su, Z.; Olman, V.; Xu, Y. Computational prediction of Pho regulons in cyanobacteria. *BMC Genomics* **2007**, *8*, 156, doi:10.1186/1471-2164-8-156.
2. Ault-Riché, D.; Fraley, C.D.; Tzeng, C.-M.; Kornberg, A. Novel assay reveals multiple pathways regulating stress-induced accumulations of inorganic polyphosphate in *Escherichia coli*. *Journal of bacteriology* **1998**, *180*, 1841-1847.
3. Suzuki, S.; Ferjani, A.; Suzuki, I.; Murata, N. The SphS-SphR Two Component System Is the Exclusive Sensor for the Induction of Gene Expression in Response to Phosphate Limitation in *Synechocystis*. *Journal of Biological Chemistry* **2004**, *279*, 13234-13240, doi:10.1074/jbc.M313358200.
4. Kaneko, T. Complete Genomic Sequence of the Filamentous Nitrogen-fixing Cyanobacterium *Anabaena* sp. Strain PCC 7120. *DNA Research* **2001**, *8*, 205–213.
